# Supplementary material for: DSG2-Directed CAR-T Cells Safely and Universally Eliminate Solid Tumors
Source: Research Square preprint supplement (doi:10.21203/rs.3.rs-5909002/v1), 2026-02-12
Supplement: Supplementary file 1 [file 98e1d949a4cc327551cc2507.docx]

For the RNA-seq data, the reviewer access details are as follows:

- **Accession Number**: GSE289388
- **Token**: odkbwoyunjofnyl

For the mass spectrometry data, the reviewer access details are:

- **Project Accession**: PXD060766
- **Token**: DN8BPU8O2mqI
